# Supplementary material
Source: PubMed Central journal article supplement (PMC7150076)
Supplement: NIHMS1069062-supplement-1.pdf [file NIHMS1069062-supplement-1.pdf]

**Supplementary Table 1: Primers used for genotyping, cloning of DBH promoter region and composition of PCR used for Genotyping DBH polymorphisms**

| Marker      | Oligo      | Sequence                      | Allele | Product Size (bp) | Restriction enzyme                          | Fragment size (bp) |
|-------------|------------|-------------------------------|--------|-------------------|---------------------------------------------|--------------------|
| rs141116007 | 19bpDBHF   | 5'-AGGACCCACCACCATCCT-3'      | Ins    | 202               |                                             | 202                |
| rs1611115   | 19bpDBHR   | 5'-CCTCAATCTTGGGGCTGA-3'      | Del    |                   |                                             | 184                |
|             | rs1611115F | 5'-CAGACCTGCTGTCATGGGTA -3'   | C      | 476               | Fau I                                       | 254+222            |
|             | rs1611115R | 5'-AAGGAAAAGAGGGTGAGTGACA -3' | T      |                   | (New England Biolabs, Ipswich, MA, USA)     | 476                |
| rs1989787   | rs1989787F | 5'-TCTCTCCCCTCTGGGGTATT-3'    | A      | 445               | Eco47III (AfeI)                             | 445                |
|             | rs1989787R | 5'-GCTAGAGGAAAGCCAGTTTTGA-3'  | G      |                   | (Thermo Fisher Scientific, Waltham, MA,USA) | 329+116            |

**Composition of PCR used to genotype DBH markers**

|                                            | rs141116007 | rs1989787 | rs1611115 |
|--------------------------------------------|-------------|-----------|-----------|
| <b>Components</b>                          |             |           |           |
| 10x Reaction buffer MgCl <sub>2</sub> free | 2.0         | 2.0       | 1.0       |
| 50mM MgCl <sub>2</sub>                     | 0.6         | 0.8       | 0.4       |
| 2.5mM dNTPS                                | 1.6         | 2.0       | 1.0       |
| Forward Primer (10pmoles/μl)               | 1.0         | 1.0       | 0.25      |
| Reverse Primer (10pmoles/μl)               | 1.0         | 1.0       | 0.25      |
| 3B DNA polymerase (5U/μl)                  | 0.5         | 0.2       | 0.1       |
| H <sub>2</sub> O                           | 11.3        | 11.0      | 6.0       |
| DNA (25ng/μl)                              | 2.0         | 2.0       | 1.0       |
| <b>Reaction volume(μl)</b>                 | 20          | 20        | 10        |

**Primers used for cloning DBH promoter region and thermal cycling conditions for the PCR**

| Name | Sequence <sup>#</sup> | T <sub>m</sub> <sup>°*</sup> | Amplicon length |
|------|-----------------------|------------------------------|-----------------|
|------|-----------------------|------------------------------|-----------------|

|               |                                                  |           |        |
|---------------|--------------------------------------------------|-----------|--------|
| DBH 19bp incF | 5'-CTAT <del>ACGCGT</del> TCTGTGCCACCTTTTCCAG-3' | 72.1/58.4 | 5677bp |
| Prom 2        | 5'-GCTT <del>CTCGAC</del> GGCTGGGGTGAGCTCTCT-3'  | 76/60.7   |        |
| DelXIX F      | 5'-CTGTCTCGCTAGCCCTCACTGCAT-3'                   | 68.7      | 2262bp |
| DelXIX R      | 5'-TTGGCCACATGCCTCCCTGT-3'                       | 62.5      |        |

#Sequence from 5' to the end of highlighted region are overhangs and highlighted region is restriction sites (Mlu I and Xho I respectively) followed by sequence complimentary to genomic DNA

\*Tm of the entire oligo / Tm of the complimentary region

### Supplementary Table 2: PCR cycling, restriction digestion conditions for genotyping and thermal cycling conditions for amplicons used in cloning DBH promoter region

| Steps                                                                               | Thermal cycling condition for rs141116007 amplicon |                          |             | Thermal cycling condition for rs1989787 amplicon |        |             | Thermal cycling condition for rs1611115 amplicon |       |             |
|-------------------------------------------------------------------------------------|----------------------------------------------------|--------------------------|-------------|--------------------------------------------------|--------|-------------|--------------------------------------------------|-------|-------------|
|                                                                                     | °C                                                 | Time                     | Cycles      | °C                                               | Time   | Cycles      | °C                                               | Time  | Cycles      |
| 1                                                                                   | 95                                                 | 5min                     |             | 94                                               | 5min   |             | 94                                               | 5min  |             |
| 2                                                                                   | 95                                                 | 15s                      | Step 2 to 4 | 94                                               | 1min   | Step 2 to 4 | 94                                               | 1min  | Step 2 to 4 |
| 3                                                                                   | 59                                                 | 30s                      | 35 cycles   | 58                                               | 30s    | 40 cycles   | 58                                               | 30s   | 35 cycles   |
| 4                                                                                   | 72                                                 | 30s                      |             | 72                                               | 1min   |             | 72                                               | 1min  |             |
| 5                                                                                   | 72                                                 | 7min                     |             | 72                                               | 15min  |             | 72                                               | 15min |             |
| 7                                                                                   | 4                                                  | ∞                        |             | 4                                                | ∞      |             | 4                                                | ∞     |             |
| <b>Restriction digestion conditions for rs1989787 and rs1611115</b>                 |                                                    |                          |             |                                                  |        |             |                                                  |       |             |
| <b>rs1989787</b>                                                                    |                                                    |                          |             | <b>rs1611115</b>                                 |        |             |                                                  |       |             |
| Components                                                                          | Volume (µl)                                        | Components               | Volume (µl) |                                                  |        |             |                                                  |       |             |
| 10 x Buffer O                                                                       | 2.5                                                | 10 x Cutsmart™<br>buffer | 1.5         |                                                  |        |             |                                                  |       |             |
| PCR reaction                                                                        | 20.0                                               | PCR reaction             | 10.0        |                                                  |        |             |                                                  |       |             |
| H <sub>2</sub> O                                                                    | 2.4                                                | H <sub>2</sub> O         | 3.3         |                                                  |        |             |                                                  |       |             |
| Eco47III (AfeI) 10 U/ µl                                                            | 0.1                                                | FauI 5U/ µl              | 0.2         |                                                  |        |             |                                                  |       |             |
| Incubate 37°C O/N                                                                   |                                                    |                          |             | Incubate 55°C O/N                                |        |             |                                                  |       |             |
| <b>PCR cycling conditions for the two amplicons for cloning DBH promoter region</b> |                                                    |                          |             |                                                  |        |             |                                                  |       |             |
| Steps                                                                               | Cycling condition for Insert I                     |                          |             | Cycling conditions for Insert II                 |        |             |                                                  |       |             |
| 1                                                                                   | 94°C                                               | 1min                     |             | 94°C                                             | 1min   |             |                                                  |       |             |
| 2                                                                                   | 98°C                                               | 10s                      | Step 2 to 4 | 98°C                                             | 10s    | Step 2 to 4 |                                                  |       |             |
| 3                                                                                   | 62°C                                               | 30s                      | 35 cycles   | 66°C                                             | 30s    | 35 cycles   |                                                  |       |             |
| 4                                                                                   | 72°C                                               | 5.6min                   |             | 72°C                                             | 2.2min |             |                                                  |       |             |
| 5                                                                                   | 72°C                                               | 10min                    |             | 72°C                                             | 10min  |             |                                                  |       |             |
| 6                                                                                   | 4°C                                                | ∞                        |             | 4°C                                              | ∞      |             |                                                  |       |             |







**Supplementary Figure 1: Position of *DBH* variants selected for genotyping with respect to the gene**

The three variants that were studied 19bp *Ins/Del*, rs1989787 and rs1611115 are marked with respect to *DBH* gene. The Exons are drawn to scale. Linkage disequilibrium (LD) measures ( $D'$  and  $R$ -sq) between the three variants are given in the table

**Supplementary Figure 1: Position of *DBH* variants selected for genotyping with respect to the gene**

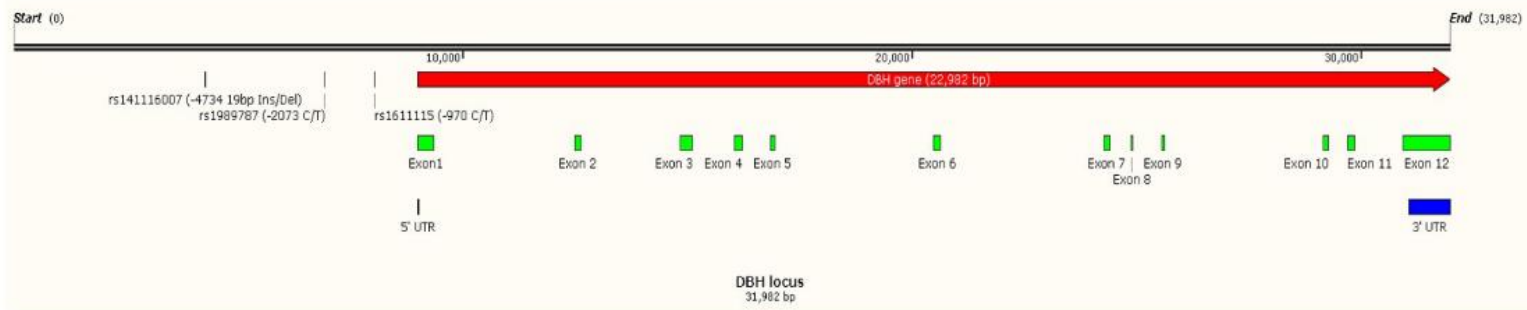

| Marker 1    | Marker 2  | $D'$ | $R$ -Sq |
|-------------|-----------|------|---------|
| rs141116007 | rs1611115 | 0.23 | 0.02    |
| rs141116007 | rs1989787 | 0.57 | 0.05    |
| rs1989787   | rs1611115 | 0.82 | 0.03    |

**Supplementary Figure 2: *DBH* WT promoter construct used for functional analysis**

pGL3 *DBH* promoter WT construct (10.5kb) with 19bp *Ins* allele(rs141116007) with the primers used for cloning namely *DBH* 19bp incF and prom2 for amplicon I with Mlu I and Xho I overhangs; Del XIXF and Del XIXR for amplicon II with Nhe I and Sac II are also depicted

**Supplementary Figure 2: *DBH* WT promoter construct used for functional analysis**

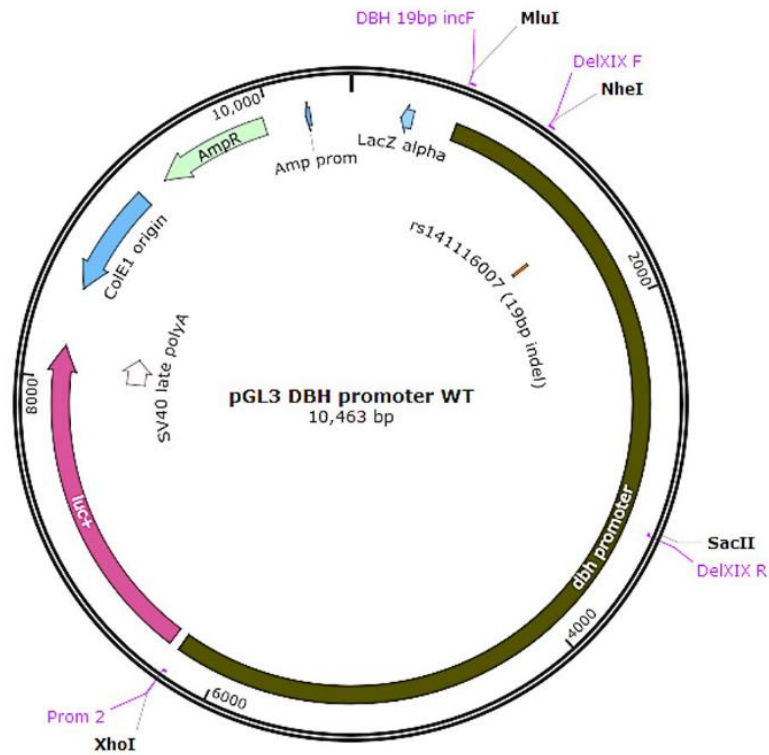

**Supplementary Figure 3: A decrease in accuracy, processing speed and efficiency of PennCNB neurocognitive scores in schizophrenia subjects observed with Cluster analysis**

A general decrease in all the 24 cognitive scores was observed in SZ subjects as compared to healthy controls. Accuracy, processing speed and efficiency of cognitive scores of abstraction and flexibility, attention, working memory, face memory, spatial memory, spatial processing, sensorimotor dexterity and emotional processing are illustrated.
